# Supplementary material for: Complete Genomic and Ultrastructural Analysis of a Nam Dinh Virus Isolated from Culex pipiens quinquefasciatus in China*
Source: PubMed Central journal article supplement (PMC5428213; doi:10.1038/s41598-017-00340-3), 2017-03-21
Supplement: 41598_2017_340_MOESM1_ESM.pdf [file 41598_2017_340_MOESM1_ESM.pdf]

## **Supplementary Information**

**Title: Complete Genomic and Ultrastructural analysis of a Nam Dinh  
Virus Isolated from *Culex pipiens quinquefasciatus* in China**

Authors: Jianming Zhou, Yujuan Jin, Yingjian Chen, Jingmei Li, Qiwen  
Zhang, Xianqing Xie, Liping Gan and Qu Liu.

**Supplementary Table S1**

**Supplementary Figure S1**

**Table S1****Table S1. The primer sets for amplifying the complete genome of NDIV**

| <b>Primer</b> | <b>Sequence,5'-3'</b>        | <b>Position</b> |
|---------------|------------------------------|-----------------|
| NDiV-SZ-1-F   | ACTAAAGAACTTTTGTTCCTCCATAAT  | 1–30            |
| NDiV-SZ-1-R   | CATAGTGGCGTCATCTAGCTCG       | 1107–1128       |
| NDiV-SZ-2-F   | GCGAACTTACCACTATTGAATCTAACCT | 944–971         |
| NDiV-SZ-2-R   | CATGTCTTACGACAGGAGGGG        | 2007–2027       |
| NDiV-SZ-3-F   | CCTGCTTGCATTCTATTCACCG       | 1888–1909       |
| NDiV-SZ-3-R   | TGGTCTTCCAGGAGCTGC           | 2931–2948       |
| NDiV-SZ-4-F   | AGTCTTTGTTTTGGGCACGC         | 2817–2836       |
| NDiV-SZ-4-R   | TGTGGCCAATTGCAAGATG          | 4068–4086       |
| NDiV-SZ-5-F   | GGACCACTGTTGCTAACACCT        | 3886–3906       |
| NDiV-SZ-5-R   | CAGCGCAATGCAAGCCTA           | 5024–5041       |
| NDiV-SZ-6-F   | TTGTCACGTTACGACACGGAA        | 4888–4908       |
| NDiV-SZ-6-R   | GTAAAGGCGGCGTAGGGT           | 5883–5901       |
| NDiV-SZ-7-F   | GCCATCCGCTACAATCCCTA         | 5746–5765       |
| NDiV-SZ-7-R   | TACCTGTCCATAGTATTGTCGTGAGT   | 6864–6889       |
| NDiV-SZ-8-F   | TTCTCGGCTCTGACCTGGA          | 6752–6770       |
| NDiV-SZ-8-R   | TGTTCTGCTTAGAGTACGAGCC       | 7859–7881       |
| NDiV-SZ-9-F   | AACTTACGCAGACAACACCGTTA      | 7716–7738       |
| NDiV-SZ-9-R   | TGCGGACAATCCATAGTATCG        | 8762–8782       |
| NDiV-SZ-10-F  | AATCGGCAGTTGAGGCTACTCG       | 8617–8638       |
| NDiV-SZ-10-R  | GGTATGGAGTACCGGCTGAT         | 9701–9720       |
| NDiV-SZ-11-F  | ATCAGAACACCGCTGGCTC          | 9550–9568       |
| NDiV-SZ-11-R  | CATAGCGTTGGATAGCGTCGAT       | 10656–10677     |
| NDiV-SZ-12-F  | ACAATTCGCCGACGCGTA           | 10506–10523     |
| NDiV-SZ-12-R  | TGTCACACGCTTTGTGTCTGTTAC     | 11496–11519     |
| NDiV-SZ-13-F  | TATACACCACTGGCCGTGACC        | 11386–11406     |
| NDiV-SZ-13-R  | GTGCAAGGCCGGTTAGTAGG         | 12551–12570     |

|              |                             |             |
|--------------|-----------------------------|-------------|
| NDiV-SZ-14-F | CAAAGACCGCATTGCGTGA         | 12443–12462 |
| NDiV-SZ-14-R | ATAGCGCACTGGAATGCCTG        | 13546–13565 |
| NDiV-SZ-15-F | CAATGAACATAGTTATGGACGACTGTA | 13420–13446 |
| NDiV-SZ-15-R | AAGCCAGTGGTCCCGAGTTT        | 14589–14608 |
| NDiV-SZ-16-F | AATCCACAGAATAACATGAACACC    | 14454–14477 |
| NDiV-SZ-16-R | TGTGATGTCCAGCCTTGTACG       | 15512–15532 |
| NDiV-SZ-17-F | GGAGCGACTGAAGACGTACTACAA    | 15378–15401 |
| NDiV-SZ-17-R | AGGCGTCAACAAGTGGTTGG        | 16499–16518 |
| NDiV-SZ-18-F | CTGCCTAATGCTAACTGCTCTACC    | 16305–16328 |
| NDiV-SZ-18-R | CTAAGCTGTGATTGTAAGTCGTGGA   | 17095–17119 |
| NDiV-SZ-19-F | CACTTGTATCTAGCGCCGCTAA      | 16975–16996 |
| NDiV-SZ-19-R | TTGCGTCATTGACACGTAGG        | 18026–18045 |
| NDiV-SZ-20-F | TGCAACTCTACAGTCCAGATCC      | 17928–17949 |
| NDiV-SZ-20-R | GGAGGAGCGTATAACTGCCGT       | 18838–18858 |
| NDiV-SZ-21-F | TGGCGGCTAGCGTCACACTT        | 18688–18707 |
| NDiV-SZ-21-R | AAGAATGGCCGGTACAATGTG       | 19642–19662 |
| NDiV-SZ-22-F | GCCTGGAACAAGCCGATCA         | 19521–19539 |
| NDiV-SZ-22-R | TTTACCTGTAATGCCAAGCGCC      | 20106–20127 |

---

**Figure S1**

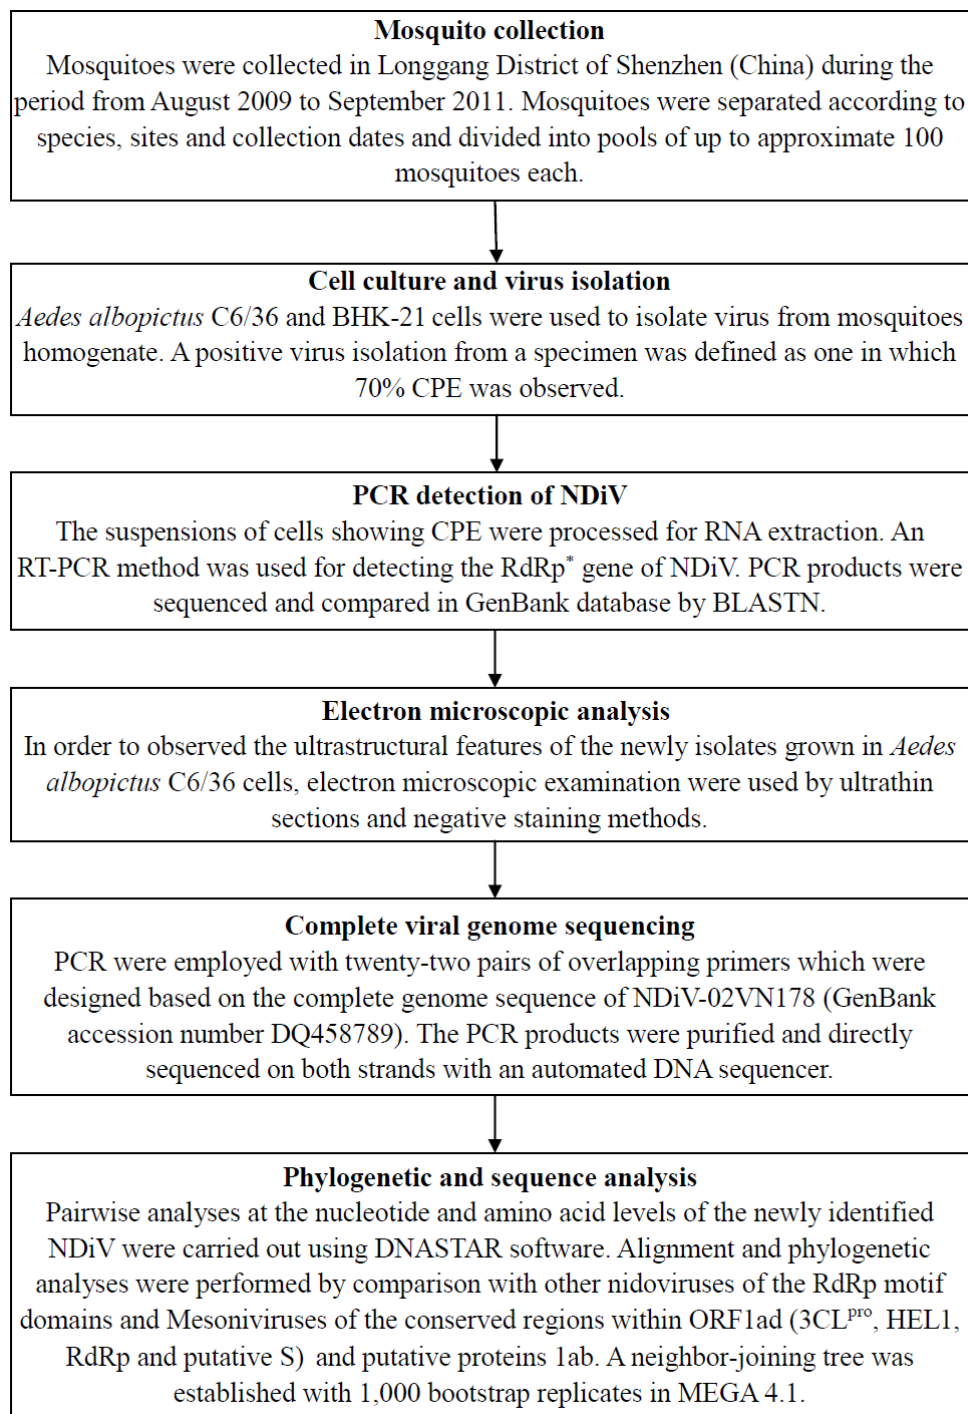

**Figure S1. The flowchart for isolation and identification of Nam Dinh virus.** \* BHK-21, baby hamster kidney; CPE, Cytopathic effects; RT-PCR, reverse transcription-polymerase chain reaction; RdRp, RNA-dependent RNA-polymerase; NDiV, Nam Dinh virus; PCR, polymerase chain reaction; 3CL<sup>pro</sup>, 3C-like chymotrypsin-like protease; HEL1, Superfamily 1 Helicase; S, spike glycoprotein.
